# Supplementary material for: Hydrolyzed Bound Phenolics from Rice Bran Alleviate Hyperlipidemia and Improve Gut Microbiota Dysbiosis in High-Fat-Diet Fed Mice
Source: MDPI journal article supplement (doi:10.3390/nu14061277), 2022-03-17
Supplement: s1 [file s1]

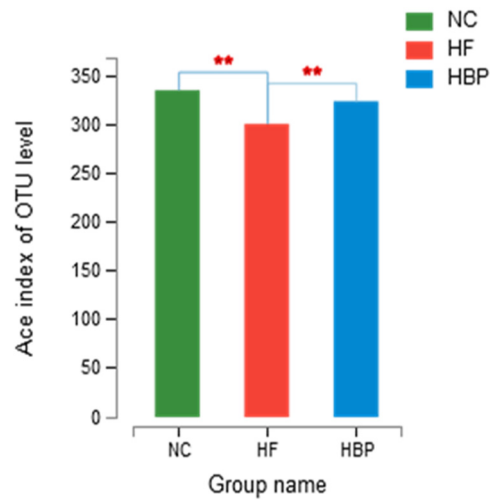

**Figure S1.** The alpha diversity of gut microbiota of mice from different groups. (NC, normal control group; HF, high-fat-diet fed group; HBP, high-fat-diet fed group treated with hydrolyzed bound phenolics).

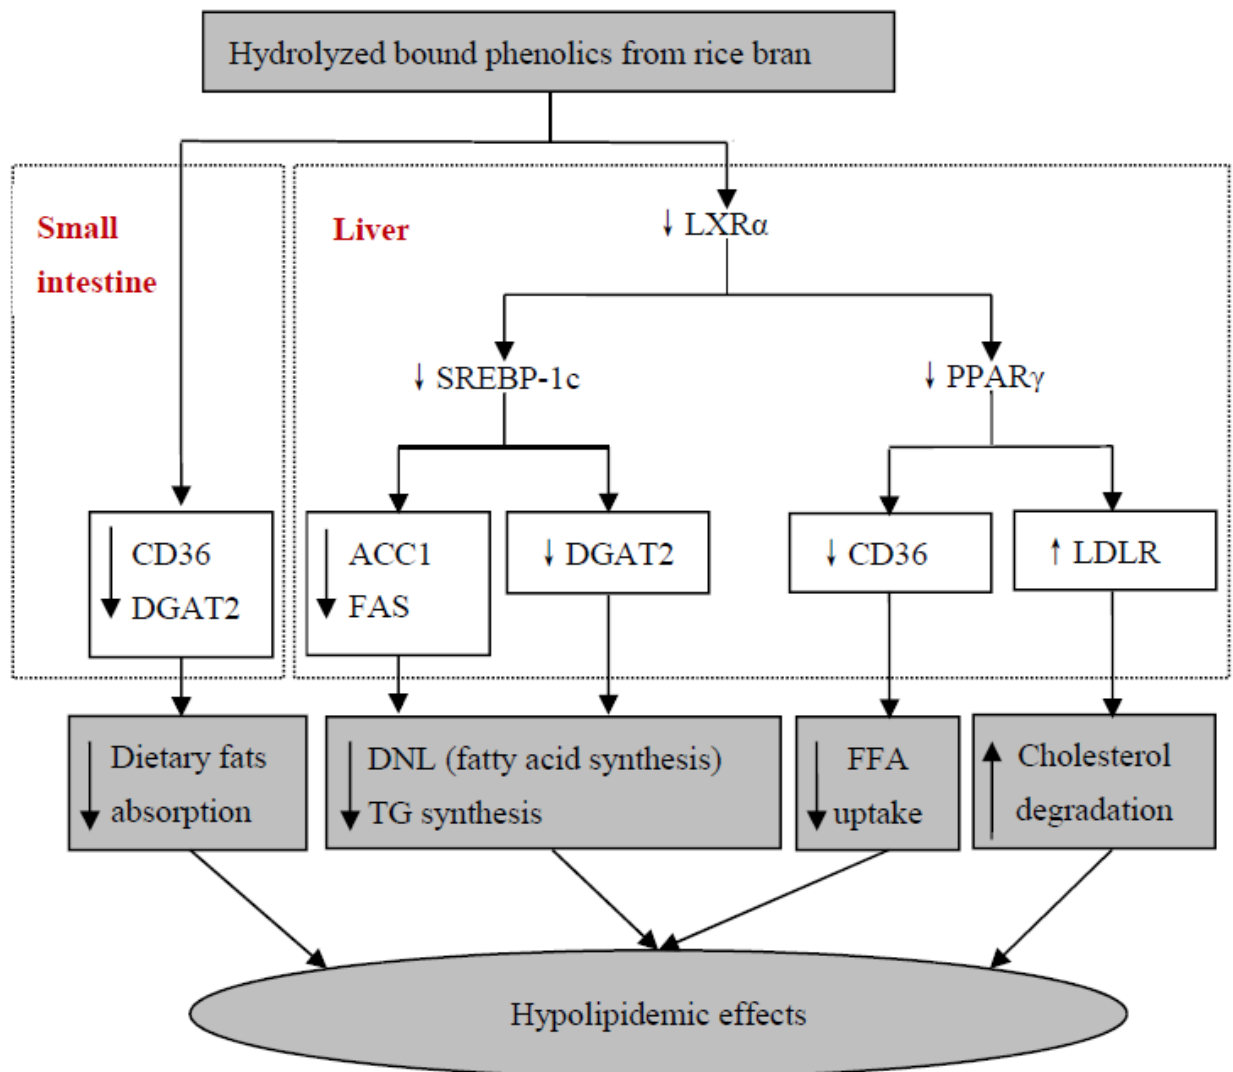

**Figure S2.** The possible hypolipidemic mechanism of HBP from rice bran.

**Table S1.** The contents of monomer phenolics in hydrolyzed bound phenolics. (HBP) from rice bran.

| <b>Varieties</b>              | <b>Contents (g/100g)</b> |
|-------------------------------|--------------------------|
| <i>p</i> -Hydroxybenzoic acid | 0.04 ± 0.00              |
| Vanillic acid                 | 0.14 ± 0.00              |
| Syringic acid                 | 0.06 ± 0.00              |
| <i>p</i> -Coumaric acid       | 13.95 ± 0.07             |
| Ferulic acid                  | 65.03 ± 0.88             |
| Caffeic acid methyl           | 0.07 ± 0.00              |
| Ferulic acid methyl ester     | 0.03 ± 0.00              |
